# Supplementary material for: Microsaccade-rhythmic modulation of neural synchronization and coding within and across cortical areas V1 and V2
Source: PubMed Central journal article supplement (PMC5997357; doi:10.1371/journal.pbio.2004132), 2018-05-31

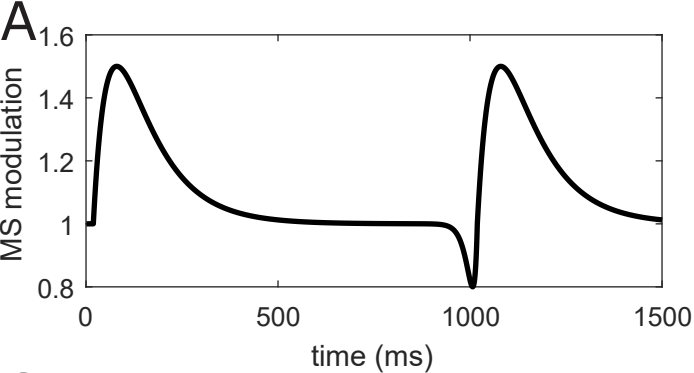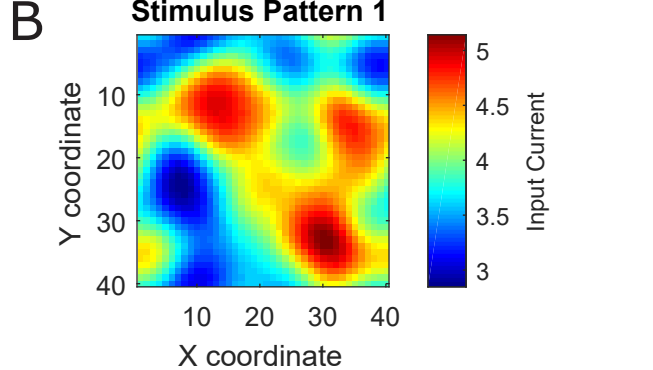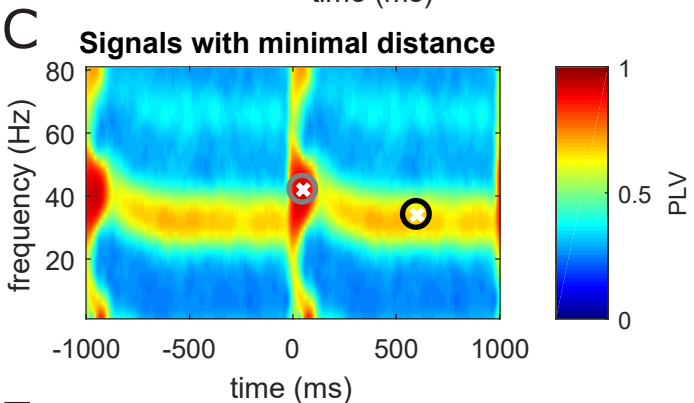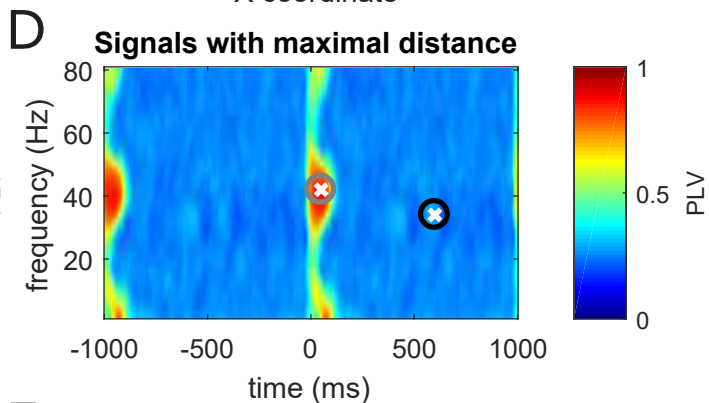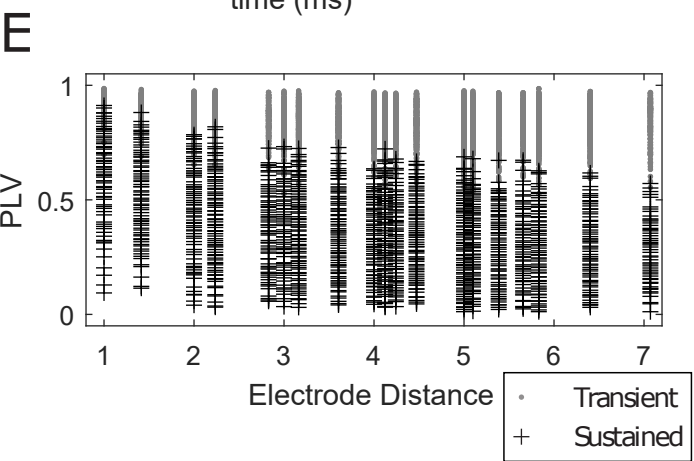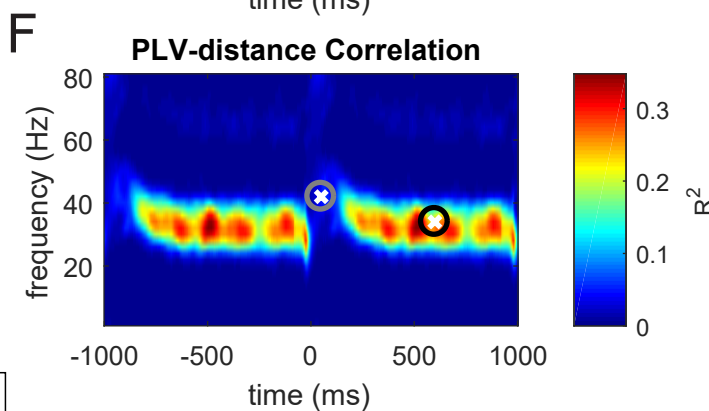

Supplement: pbio.2004132.s001.pdf [file pbio.2004132.s001.pdf]
